# Supplementary material for: Association of objective and subjective socioeconomic markers with cognitive impairment among older adults: cross-sectional evidence from a developing country
Source: PubMed Central journal article supplement — BMJ Open. 2022 Aug 18;12(8):e052501. doi: 10.1136/bmjopen-2021-052501 (PMC9394209; doi:10.1136/bmjopen-2021-052501), 2022-08-18
Supplement: bmjopen-2021-052501supp001.pdf [file bmjopen-2021-052501supp001.pdf]

**Table-S1.** Regression estimates for cognitive impairment by each aspect of SES among older adults in India, 2017-18

| Background characteristics         | Model-1           |                   | Model-2          |                   | Model-3              |                   | Model-4           |                   |
|------------------------------------|-------------------|-------------------|------------------|-------------------|----------------------|-------------------|-------------------|-------------------|
|                                    | aOR (95% CI)      | Standardized beta | aOR (95% CI)     | Standardized beta | aOR (95% CI)         | Standardized beta | aOR (95% CI)      | Standardized beta |
| <b>Subjective SES</b>              |                   |                   |                  |                   |                      |                   |                   |                   |
| <b>Ladder SES</b>                  |                   |                   |                  |                   |                      |                   |                   |                   |
| Low                                | Ref.              |                   |                  |                   |                      |                   |                   |                   |
| Medium                             | 1.76*(1.42, 2.18) | 0.17              |                  |                   |                      |                   |                   |                   |
| High                               | 3.16*(2.54, 3.93) | 0.30              |                  |                   |                      |                   |                   |                   |
| <b>Objective SES</b>               |                   |                   |                  |                   |                      |                   |                   |                   |
| <b>MPCE quintile</b>               |                   |                   |                  |                   |                      |                   |                   |                   |
| Low                                |                   |                   | Ref.             |                   |                      |                   |                   |                   |
| Medium                             |                   |                   | 1.3*(1.16, 1.46) | 0.06              |                      |                   |                   |                   |
| High                               |                   |                   | 1.76*(1.6, 1.94) | 0.15              |                      |                   |                   |                   |
| <b>Education</b>                   |                   |                   |                  |                   |                      |                   |                   |                   |
| Not educated/primary not completed |                   |                   |                  |                   | 31.13*(14.74, 65.73) | 0.58              |                   |                   |
| Primary                            |                   |                   |                  |                   | 4.75*(2.18, 10.35)   | 0.17              |                   |                   |
| Secondary                          |                   |                   |                  |                   | 2.19(0.97, 4.94)     | 0.09              |                   |                   |
| Higher                             |                   |                   |                  |                   | Ref.                 |                   |                   |                   |
| <b>Caste</b>                       |                   |                   |                  |                   |                      |                   |                   |                   |
| Scheduled Castes                   |                   |                   |                  |                   |                      |                   | 1.88*(1.66, 2.15) | 0.13              |
| Scheduled Tribes                   |                   |                   |                  |                   |                      |                   | 2.75*(2.38, 3.18) | 0.17              |
| Other Backward Classes             |                   |                   |                  |                   |                      |                   | 1.26*(1.13, 1.42) | 0.08              |
| Others                             |                   |                   |                  |                   |                      |                   | Ref.              |                   |

Ref: Reference; aOR: Adjusted Odds Ratio; CI: Confidence Interval; SES: Socio-economic status; MPCE: Monthly per capita consumption expenditure;

---

*Model-1 included SES and Individual, Health and Household factors; Model-2 included MPCE quintile and Individual, Health and Household factors; Model-3 included education and Individual, Health and Household factors and Model-4 included caste and Individual, Health and Household factors.*

---

**Table-S2.** Sensitivity analysis estimates for cognitive impairment after adjusting for education among older adults in India, 2017-18

| Background characteristics   |                                    | Model-1<br>OR (95% CI) | Model-2<br>aOR (95% CI) |
|------------------------------|------------------------------------|------------------------|-------------------------|
| <b>Socio-economic status</b> |                                    |                        |                         |
| <b>Subjective SES</b>        |                                    |                        |                         |
| <b>Ladder SES</b>            |                                    |                        |                         |
|                              | High                               | Ref.                   | Ref.                    |
|                              | Medium                             | 1.44*(1.21,1.7)        | 1.53*(1.28,1.82)        |
|                              | Low                                | 1.81*(1.52,2.16)       | 2.04*(1.69,2.46)        |
| <b>Objective SES</b>         |                                    |                        |                         |
| <b>MPCE quintile</b>         |                                    |                        |                         |
|                              | High                               | Ref.                   | Ref.                    |
|                              | Medium                             | 1.06(0.95,1.18)        | 1.14*(1.01,1.27)        |
|                              | Low                                | 1.17*(1.08,1.28)       | 1.28*(1.16,1.42)        |
| <b>Education</b>             |                                    |                        |                         |
|                              | Not educated/primary not completed | 0.72*(0.63,0.82)       | 0.21*(0.18,0.25)        |
|                              | Primary                            | 0.81*(0.69,0.95)       | 0.43*(0.36,0.51)        |
|                              | Secondary                          | 0.87(0.75,1.01)        | 0.61*(0.52,0.71)        |
|                              | Higher                             | Ref.                   | Ref.                    |
| <b>Caste</b>                 |                                    |                        |                         |
|                              | Scheduled Castes                   | 1.03(0.91,1.16)        | 1.26*(1.11,1.44)        |
|                              | Scheduled Tribes                   | 1.21*(1.08,1.37)       | 1.71*(1.47,1.98)        |
|                              | Other Backward Classes             | 0.84*(0.76,0.92)       | 0.98(0.88,1.09)         |
|                              | Others                             | Ref.                   | Ref.                    |

*Ref: Reference; OR: Unadjusted Odds Ratio; aOR: Adjusted Odds Ratio; CI: Confidence Interval; SES: Socio-economic status; Cognitive impairment was adjusted for education (lowest 10<sup>th</sup> percentile of each educational category was considered cognitively impaired, i.e, with a cut-off score of 14 for no educated/primary not completed, 21 for primary, 24 for secondary and 27 for higher education groups); Model-2 was adjusted for Individual, Health and Household related factors*

**Table-S3.** Sensitivity analysis estimates (Interaction models) for cognitive impairment after adjusting for education among older adults in India, 2017-18

| Background characteristics                  | Model-3          | Model-4          | Model-5          |
|---------------------------------------------|------------------|------------------|------------------|
|                                             | aOR (95% CI)     | aOR (95% CI)     | aOR (95% CI)     |
| <b>Ladder SES # MPCE quintile</b>           |                  |                  |                  |
| High # high                                 | Ref.             |                  |                  |
| High # middle                               | 1.44*(1.14,1.83) |                  |                  |
| High # low                                  | 1.97*(1.52,2.57) |                  |                  |
| Middle # high                               | 1.14(0.73,1.76)  |                  |                  |
| Middle # middle                             | 1.68*(1.3,2.17)  |                  |                  |
| Middle # low                                | 2.16*(1.64,2.85) |                  |                  |
| Low # high                                  | 1.08(0.72,1.62)  |                  |                  |
| Low # middle                                | 1.89*(1.48,2.42) |                  |                  |
| Low # low                                   | 2.51*(1.95,3.23) |                  |                  |
| <b>Ladder SES # Education</b>               |                  |                  |                  |
| High # higher                               |                  | Ref.             |                  |
| High # secondary                            |                  | 0.6*(0.39,0.94)  |                  |
| High # primary                              |                  | 0.54*(0.32,0.92) |                  |
| High # Not educated/primary not completed   |                  | 0.19*(0.12,0.3)  |                  |
| Middle # higher                             |                  | 1.52*(1.09,2.13) |                  |
| Middle # secondary                          |                  | 0.93(0.67,1.28)  |                  |
| Middle # primary                            |                  | 0.67*(0.48,0.94) |                  |
| Middle # Not educated/primary not completed |                  | 0.34*(0.25,0.47) |                  |
| Low # higher                                |                  | 1.84*(1.15,2.95) |                  |
| Low# secondary                              |                  | 1.34(0.94,1.93)  |                  |
| Low # primary                               |                  | 0.87(0.61,1.25)  |                  |
| Low # Not educated/primary not completed    |                  | 0.47*(0.34,0.65) |                  |
| <b>Ladder SES # Caste</b>                   |                  |                  |                  |
| High # Others                               |                  |                  | Ref.             |
| High # Other Backward Class                 |                  |                  | 1.33(0.92,1.94)  |
| High # Scheduled Caste                      |                  |                  | 2.04*(1.14,3.62) |
| High # Scheduled Tribe                      |                  |                  | 0.97(0.52,1.8)   |
| Middle # Others                             |                  |                  | 1.72*(1.3,2.26)  |
| Middle # Other Backward Class               |                  |                  | 1.73*(1.3,2.29)  |
| Middle # Scheduled Caste                    |                  |                  | 2.23*(1.65,3.03) |
| Middle # Scheduled Tribe                    |                  |                  | 2.49*(1.82,3.42) |

---

|                            |                  |
|----------------------------|------------------|
| Low # Others               | 2.19*(1.63,2.96) |
| Low # Other Backward Class | 2.16*(1.61,2.89) |
| Low # Scheduled Caste      | 2.89*(2.13,3.92) |
| Low # Scheduled Tribe      | 4.99*(3.65,6.83) |

---

*#: Interaction; Ref: Reference; aOR: Adjusted Odds Ratio; CI: Confidence Interval; SES: Socio-economic status; Cognitive impairment was adjusted for education (lowest 10<sup>th</sup> percentile of each educational category was considered cognitively impaired, i.e, with a cut-off score of 14 for no educated/primary not completed, 21 for primary, 24 for secondary and 27 for higher education groups); Model-3, 4 and 5 were adjusted for Individual, Health and Household related factors*

---
